# Supplementary material for: Stabilization of ammonium borohydride in solid solutions of NH4BH4–MBH4 (M = K, Rb, Cs)
Source: Royal Society of Chemistry journal article supplement (doi:10.1039/d2dt03173f), 2022-01-01
Supplement: d2dt03173f1.pdf [file d2dt03173f1.pdf]

**Supporting Information: Stabilization of Ammonium Borohydride in Solid Solutions of  $\text{NH}_4\text{BH}_4\text{-MBH}_4$  (M = K, Rb, Cs)**

Jakob B. Grinderslev\*, Torben R. Jensen\*

*<sup>a</sup>Interdisciplinary Nanoscience Center (iNANO) and Department of Chemistry, Aarhus University, Langelandsgade 140, DK-8000 Aarhus C, Denmark*

\*Corresponding authors: Dr. Jakob B. Grinderslev (jakobg@inano.au.dk) and Prof. Torben R. Jensen (trj@chem.au.dk)

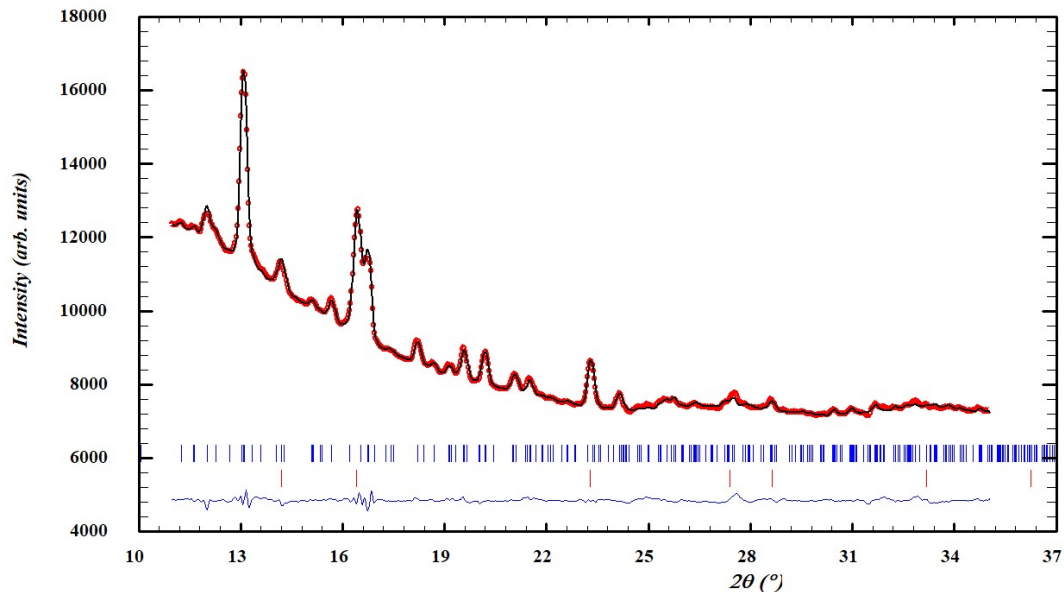

**Figure S1.** Rietveld refinement of SR PXD data of cryomilled  $\text{NH}_4\text{BH}_4$ , measured at  $T = 0\text{ }^\circ\text{C}$ ,  $\lambda = 0.9938\text{ \AA}$ , showing experimental (red circles) and calculated (black line) PXD patterns, and a difference plot below (blue line). Tick marks: (blue) *ortho*- $[(\text{NH}_3)_2\text{BH}_2]\text{BH}_4$  (74 wt%), (red)  $\text{NH}_4\text{BH}_4$  (26 wt%). Final discrepancy factors:  $R_p = 0.378\%$ ,  $R_{wp} = 0.540\%$  (not corrected for background),  $R_p = 12.6\%$ ,  $R_{wp} = 10.5\%$  (Conventional Rietveld R-factors),  $R_{\text{Bragg}}(\textit{ortho}\text{-}[(\text{NH}_3)_2\text{BH}_2]\text{BH}_4) = 9.29\%$ ,  $R_{\text{Bragg}}(\text{NH}_4\text{BH}_4) = 1.95\%$  and global  $\chi^2 = 73.2$

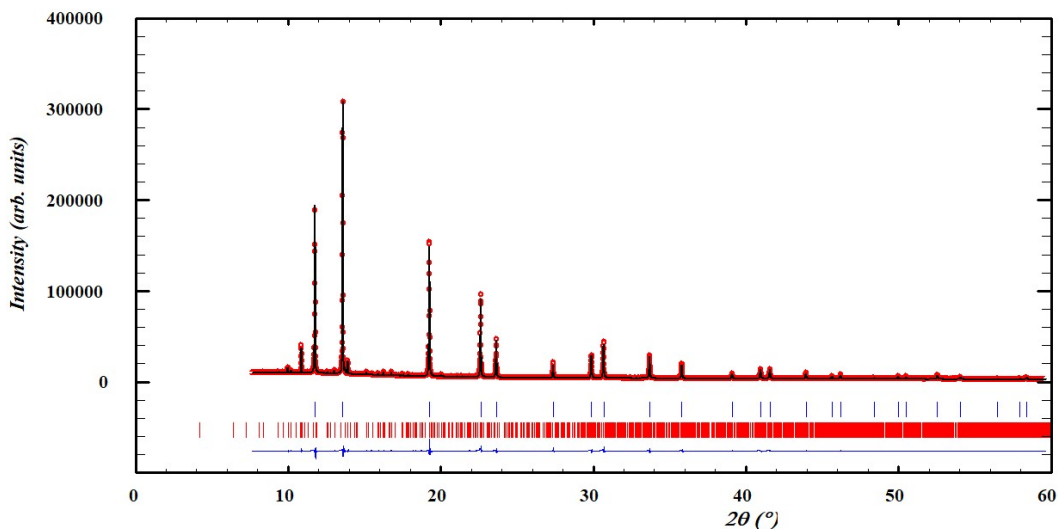

**Figure S2.** Rietveld refinement of SR PXD data of Rb31 measured at  $T = -21\text{ }^\circ\text{C}$ ,  $\lambda = 0.825775\text{ \AA}$ , showing experimental (red circles) and calculated (black line) PXD patterns, and a difference plot below (blue line). Tick marks: (blue)  $(\text{NH}_4)_{0.52}\text{Rb}_{0.48}\text{BH}_4$  (77.4 wt%), (red) *ortho*- $[(\text{NH}_3)_2\text{BH}_2]\text{BH}_4$  (22.6 wt%). Final discrepancy factors:  $R_p = 2.18\%$ ,  $R_{wp} = 3.38\%$  (not corrected for background),  $R_p = 10.4\%$ ,  $R_{wp} = 8.66\%$  (Conventional Rietveld R-factors),  $R_{\text{Bragg}}((\text{NH}_4)_{0.54}\text{Rb}_{0.46}\text{BH}_4) = 2.33\%$ ,  $R_{\text{Bragg}}([(NH_3)_2BH_2]BH_4) = 19.4\%$  and global  $\chi^2 = 68.0$

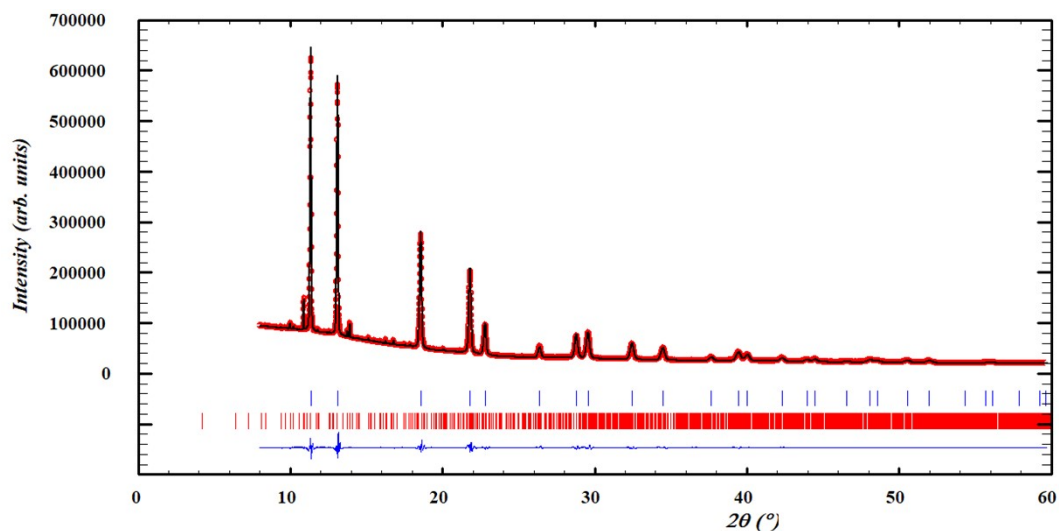

**Figure S3.** Rietveld refinement of SR PXD data of Cs31 measured at  $T = -22\text{ }^{\circ}\text{C}$ ,  $\lambda = 0.82646\text{ \AA}$ , showing experimental (red circles) and calculated (black line) PXD patterns, and a difference plot below (blue line). Tick marks: (blue)  $(\text{NH}_4)_{0.45}\text{Cs}_{0.55}\text{BH}_4$  (79.3 wt%), (red) *ortho*- $[(\text{NH}_3)_2\text{BH}_2]\text{BH}_4$  (20.7 wt%). Final discrepancy factors:  $R_p = 1.11\%$ ,  $R_{wp} = 1.78\%$  (not corrected for background),  $R_p = 7.71\%$ ,  $R_{wp} = 6.22\%$  (Conventional Rietveld R-factors),  $R_{\text{Bragg}}((\text{NH}_4)_{0.45}\text{Cs}_{0.55}\text{BH}_4) = 0.864\%$ ,  $R_{\text{Bragg}}([(NH_3)_2BH_2]BH_4) = 11.2\%$  and global  $\chi^2 = 14.7$

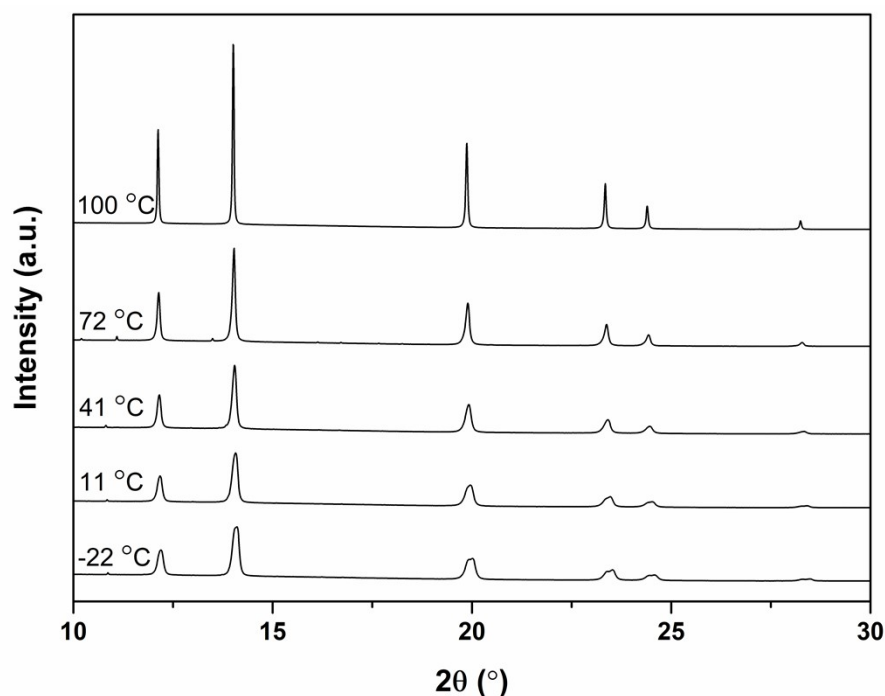

**Figure S4.** Selected SR PXD data of K13 heated from  $T = -22$  to  $100\text{ }^{\circ}\text{C}$  ( $\Delta T/\Delta t = 5\text{ }^{\circ}\text{C}/\text{min}$ ,  $p(\text{Ar}) = 1\text{ bar}$ ,  $\lambda = 0.825775\text{ \AA}$ ). The two solid solutions merge upon heating.

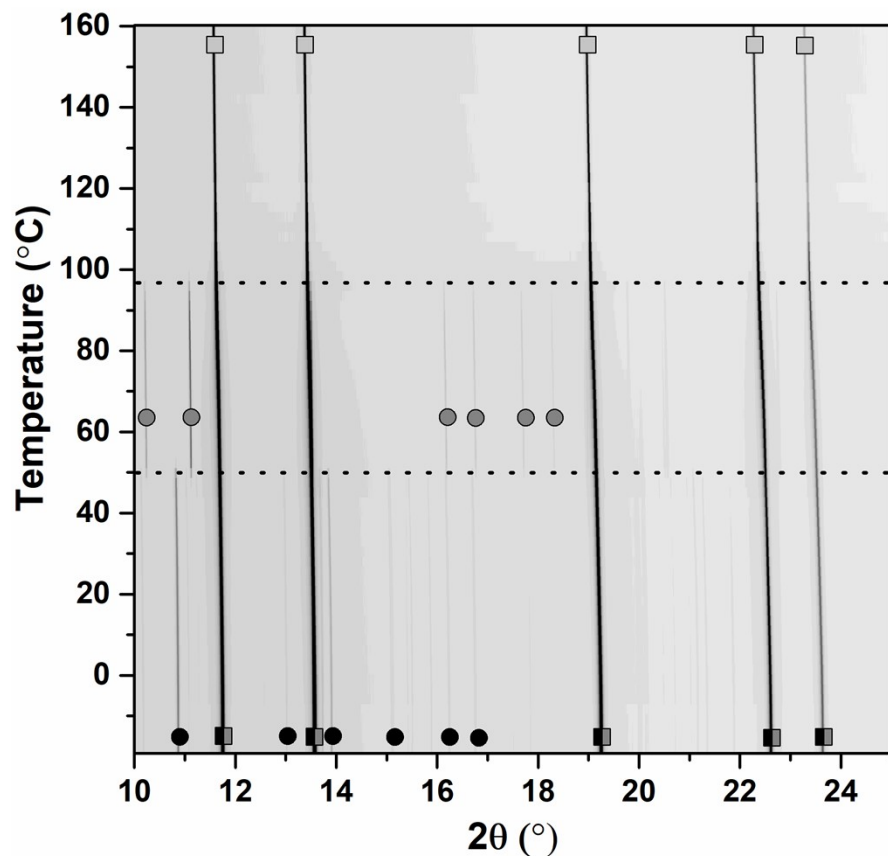

**Figure S5.** *In situ* SR PXD of Rb31 at Diamond, heated from  $T = -20$  to  $160$  °C ( $\Delta T/\Delta t = 5$  °C/min,  $p(\text{Ar}) = 1$  bar,  $\lambda = 0.82646$  Å). Symbols: Black circle: *ortho*- $[(\text{NH}_3)_2\text{BH}_2]\text{BH}_4$ , grey circle: *tetra*- $[(\text{NH}_3)_2\text{BH}_2]\text{BH}_4$ , grey/black square:  $(\text{NH}_4)_x\text{Rb}_{1-x}\text{BH}_4$ , grey square:  $\text{RbBH}_4$ . The dotted lines show the polymorphic transition from *ortho*- to *tetra*- $[(\text{NH}_3)_2\text{BH}_2]\text{BH}_4$  ( $T \sim 48$  °C) and the decomposition of *tetra*- $[(\text{NH}_3)_2\text{BH}_2]\text{BH}_4$  ( $T \sim 96$  °C).

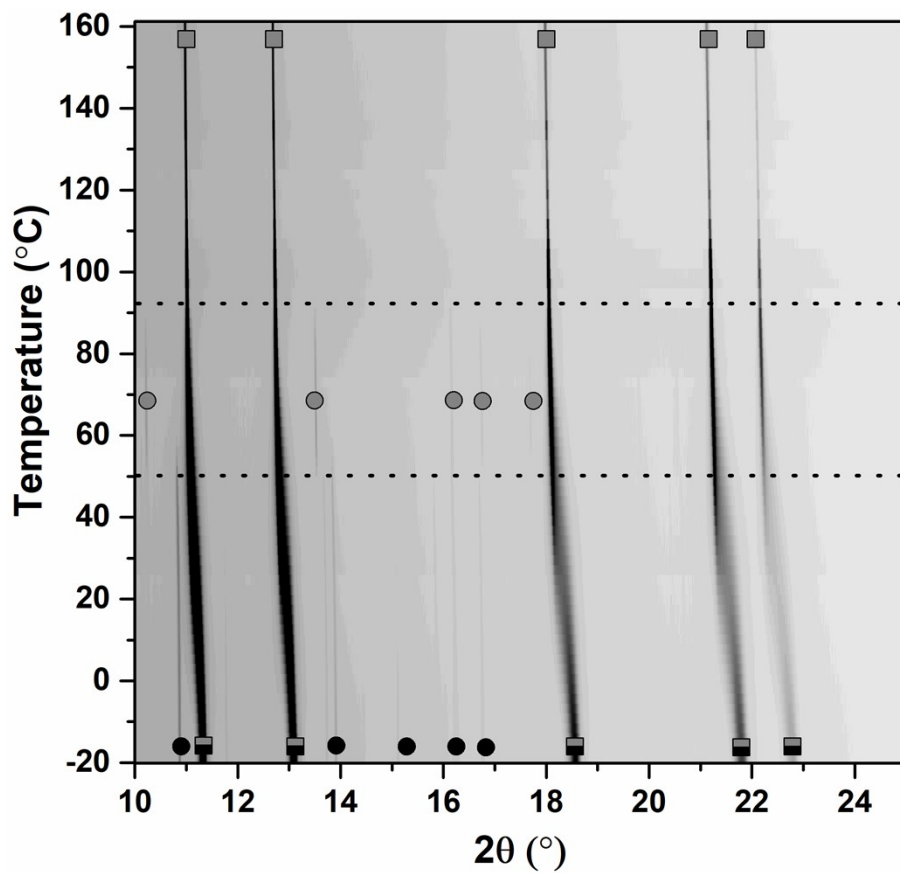

**Figure S6.** *In situ* SR PXD of Cs31 at Diamond, heated from  $T = -20$  to  $160$  °C ( $\Delta T/\Delta t = 5$  °C/min,  $p(\text{Ar}) = 1$  bar,  $\lambda = 0.82646$  Å). Symbols: Black circle: *ortho*-[(NH<sub>3</sub>)<sub>2</sub>BH<sub>2</sub>]BH<sub>4</sub>, grey circle: *tetra*-[(NH<sub>3</sub>)<sub>2</sub>BH<sub>2</sub>]BH<sub>4</sub>, grey/black square: (NH<sub>4</sub>)<sub>x</sub>Cs<sub>1-x</sub>BH<sub>4</sub>, grey square: CsBH<sub>4</sub>. The dotted lines show the polymorphic transition from *ortho*- to *tetra*-[(NH<sub>3</sub>)<sub>2</sub>BH<sub>2</sub>]BH<sub>4</sub> ( $T \sim 48$  °C) and the decomposition of *tetra*-[(NH<sub>3</sub>)<sub>2</sub>BH<sub>2</sub>]BH<sub>4</sub> ( $T \sim 96$  °C).

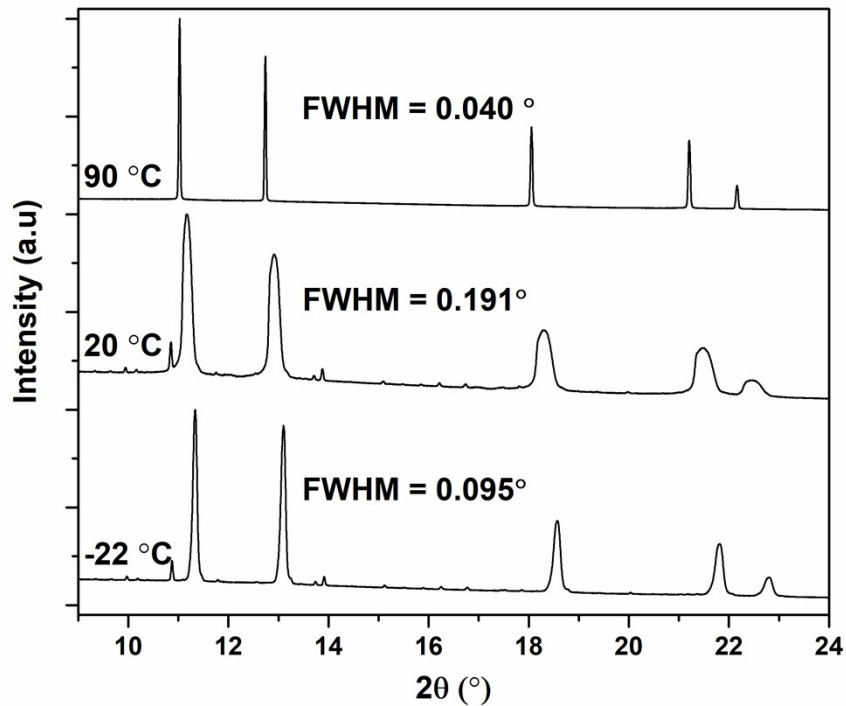

Figure S7. SR PXD and FWHM values of Cs31 at  $T = -22\text{ }^{\circ}\text{C}$ ,  $20\text{ }^{\circ}\text{C}$  and  $90\text{ }^{\circ}\text{C}$ ,  $\lambda = 0.82646\text{ \AA}$ .

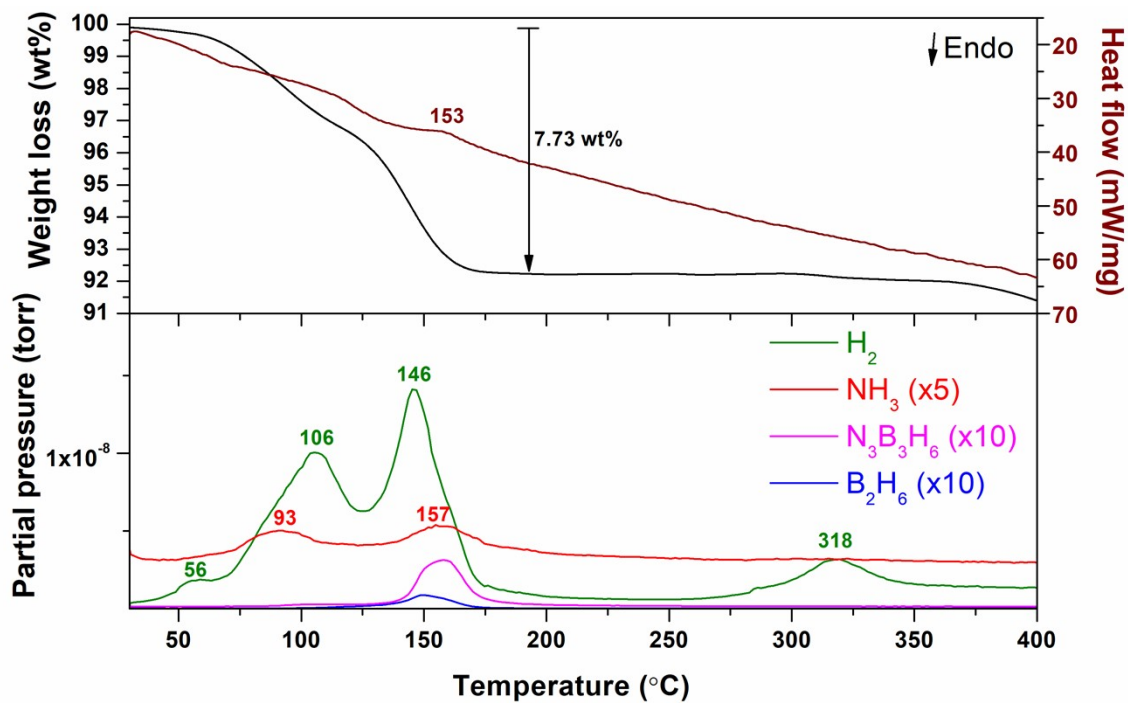

Figure S8. TG-DSC-MS of Rb11 in the temperature range  $T = 30$  to  $400\text{ }^{\circ}\text{C}$  ( $\Delta T/\Delta t = 5\text{ }^{\circ}\text{C}/\text{min}$ ).

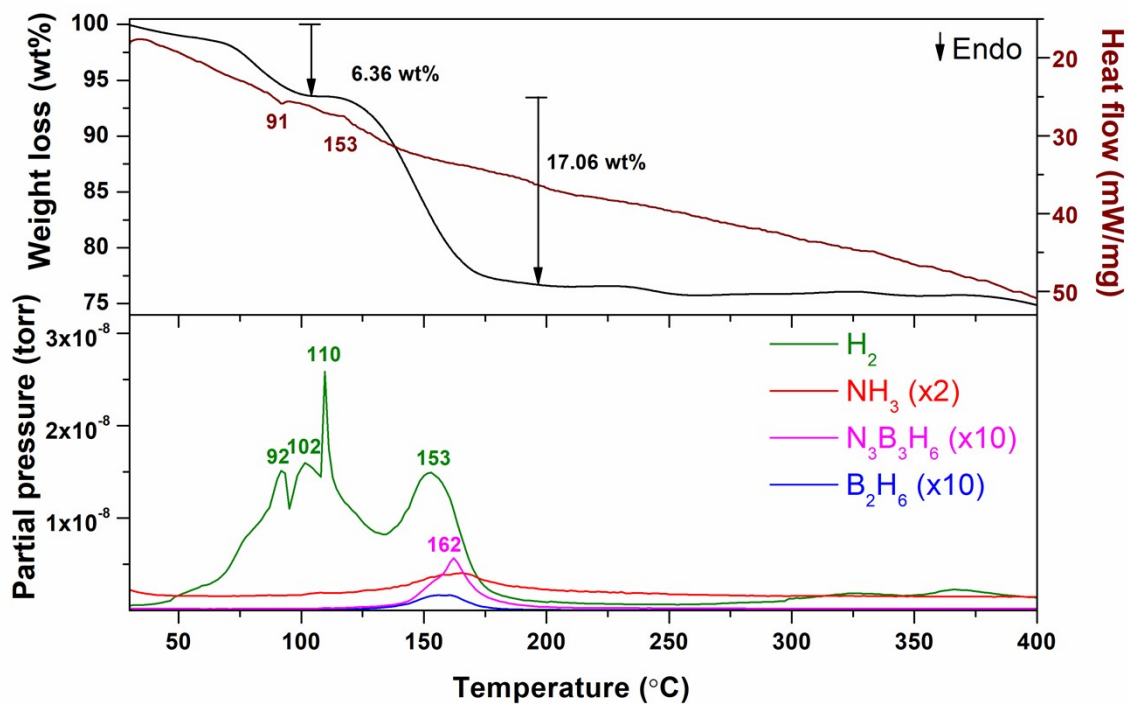

Figure S9. TG-DSC-MS of Rb31 in the temperature range  $T = 30$  to  $400$  °C ( $\Delta T/\Delta t = 5$  °C/min).

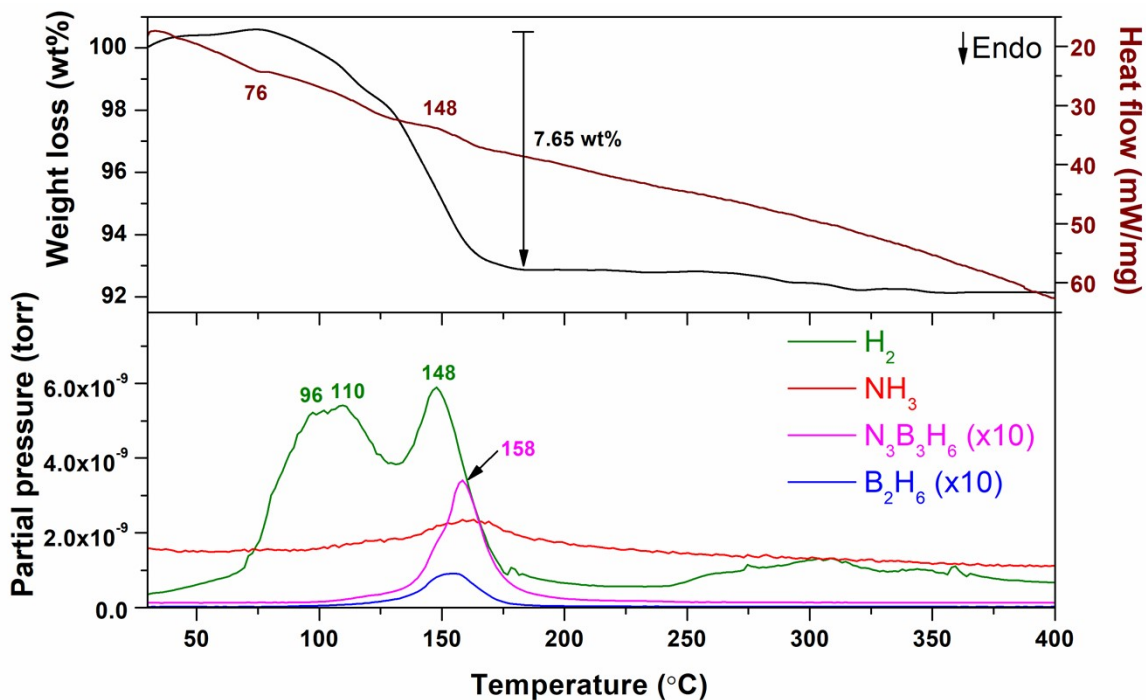

Figure S10. TG-DSC-MS of Cs11 in the temperature range  $T = 30$  to  $400$  °C ( $\Delta T/\Delta t = 5$  °C/min).

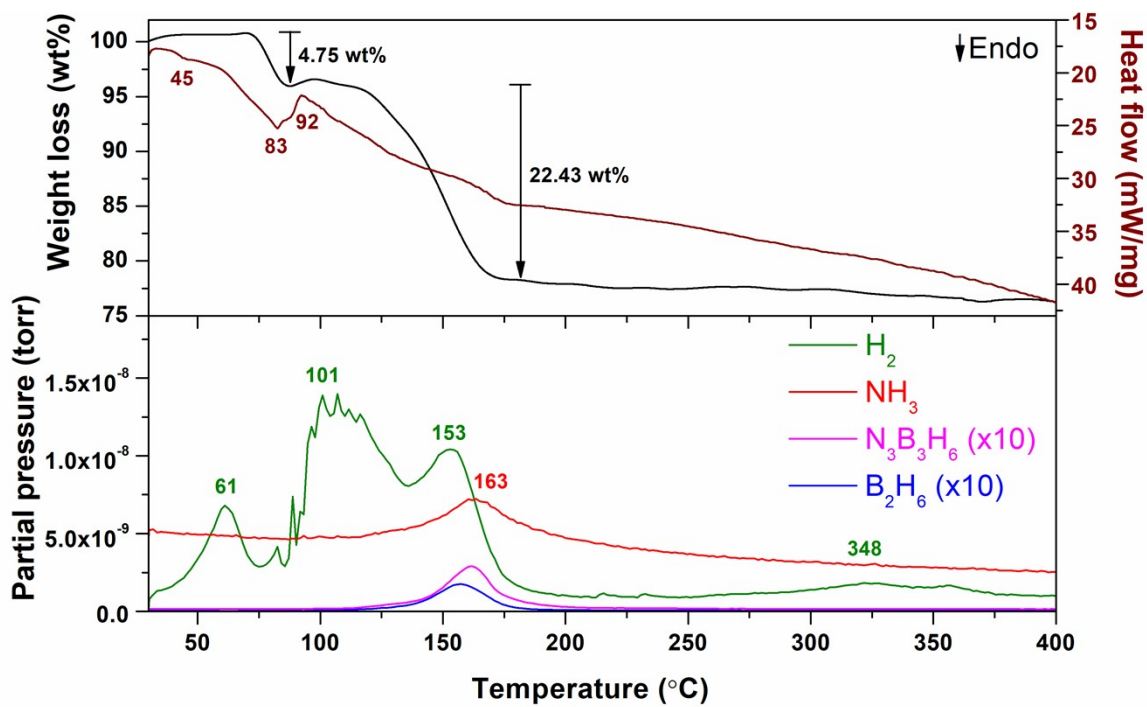

**Figure S11.** TG-DSC-MS of Cs31 in the temperature range  $T = 30$  to  $400$  °C ( $\Delta T/\Delta t = 5$  °C/min).
